# Supplementary material
Source: Elsevier journal article supplement (https://www.sciencedirect.com/science/article/pii/S0300893219304622)
Supplement: mmc1 [file mmc1.pdf]

## MATERIAL ADICIONAL

### METODOS

**Figura 1 del material adicional.** Grado de superposición de la puntuación de propensión entre cohortes.

**Figura 2 del material adicional.** Calibración del modelo FGR (presentado en T3S). El modelo presentó un índice-C de 0,640 para la discriminación y, tras una validación interna, pasó a 0,619. La validación interna se realizó con técnicas de remuestreo por *bootstrap* con un número de 500 muestras. Estos resultados muestran estabilidad en el modelo estimado.

## RESULTADOS

**Tabla 1 del material adicional**

Mortalidad a los 48 meses por causas, clase funcional y cohorte poblacional, para los casos emparejados

| Total<br>(n=1.150) | Todos                |                    |                              |            | NYHA II            |                              |       | NYHA III-IV        |                              |           |
|--------------------|----------------------|--------------------|------------------------------|------------|--------------------|------------------------------|-------|--------------------|------------------------------|-----------|
|                    | Total<br>(n = 1.150) | MUSIC<br>(n = 575) | REDINSC<br>OR I<br>(n = 575) | p          | MUSIC<br>(n = 422) | REDINSC<br>OR I<br>(n = 412) | p     | MUSIC<br>(n = 153) | REDINSC<br>OR I<br>(n = 163) | p         |
| Muerte total       | 34,6%<br>(199)       | 25,0%<br>(144)     | 29,8%<br>(343)               | <<br>0,001 | 28,4%<br>(120)     | 20,1%<br>(83)                | 0,005 | 51,6% (79)         | 37,4% (61)                   | 0,01<br>1 |
| Muerte súbita      | 12,0%<br>(69)        | 5,6% (32)          | 8,8% (101)                   | <<br>0,001 | 10,4%<br>(44)      | 5,1% (21)                    | 0,004 | 16,3% (25)         | 6,7% (11)                    | 0,00<br>7 |
| Muerte por IC      | 15,0%<br>(86)        | 10,8%<br>(62)      | 12,9%<br>(148)               | 0,035      | 10,9%<br>(46)      | 8,0% (33)                    | 0,154 | 26,1% (40)         | 17,8% (29)                   | 0,07<br>2 |
| IC refractaria     | 11,7%<br>(67)        | 9,6% (55)          | 10,6%<br>(122)               | 0,251      | 8,3%<br>(35)       | 7,3% (30)                    | 0,586 | 20,9% (32)         | 15,3% (25)                   | 0,19<br>8 |
| Trasplante         | 3,3% (19)            | 1,2% (7)           | 2,3% (26)                    | 0,017      | 2,6%<br>(11)       | 0,7% (3)                     | 0,035 | 5,2% (8)           | 2,5% (4)                     | 0,19<br>7 |

|                 |           |           |           |       |           |           |       |           |           |       |
|-----------------|-----------|-----------|-----------|-------|-----------|-----------|-------|-----------|-----------|-------|
| Otras cardiacas | 1,0% (6)  | 2,8% (16) | 1,9% (22) | 0,031 | 1,2% (5)  | 1,9% (8)  | 0,378 | 0,7% (1)  | 4,9% (8)  | 0,023 |
| Extracardiacas  | 6,6% (38) | 5,9% (34) | 6,3% (72) | 0,626 | 5,9% (25) | 5,1% (21) | 0,601 | 8,5% (13) | 8,0% (13) | 0,866 |

IC: insuficiencia cardiaca; NYHA: clase funcional de la *New York Heart Association*.

Los valores expresan % (n).

## Tabla 2 del material adicional

Análisis de regresión y riesgos competitivos de muerte a 48 meses en poblaciones emparejadas por análisis de propensión, excluidos los pacientes con terapia de resincronización cardíaca: REDINSCOR I frente a MUSIC (n = 1.074)

|               | Total               |        | NYHA II             |       | NYHA III-IV         |       |
|---------------|---------------------|--------|---------------------|-------|---------------------|-------|
|               | HR/subHR<br>(IC95%) | p      | HR/subHR<br>(IC95%) | p     | HR/subHR<br>(IC95%) | p     |
| Muerte total  | 0,69 (0,55-0,86)    | 0,001  | 0,67 (0,50-0,90)    | 0,008 | 0,70 (0,50-0,99)    | 0,047 |
| Muerte súbita | 0,44 (0,29-0,69)    | <0,001 | 0,49 (0,28-0,84)    | 0,009 | 0,37 (0,17-0,80)    | 0,011 |
| IC terminal   | 0,71 (0,50-1,00)    | 0,053  | 0,69 (0,43-1,12)    | 0,130 | 0,73 (0,44-1,18)    | 0,200 |
| Otras causas  | 1,15 (0,76-1,72)    | 0,510  | 0,98 (0,59-1,64)    | 0,950 | 1,49 (0,76-2,95)    | 0,250 |

HR: *hazard ratio*; IC: insuficiencia cardíaca; NYHA: clase funcional de la *New York Heart Association*; subHR: *sub-hazard ratio*.

«IC terminal» incluye IC refractaria y trasplante cardíaco. «Otras causas» incluye otras causas cardíacas y extracardíacas.

### Tabla 3 del material adicional

Análisis de regresión y riesgos competitivos de muerte a 48 meses, en poblaciones emparejadas por análisis de propensión, excluidos los pacientes con terapia de resincronización cardíaca o desfibrilador automático implantado: REDINSCOR I frente a MUSIC (n=976)

|               | Total               |       | NYHA II             |       | NYHA III-IV         |       |
|---------------|---------------------|-------|---------------------|-------|---------------------|-------|
|               | HR/subHR<br>(IC95%) | p     | HR/subHR<br>(IC95%) | p     | HR/subHR<br>(IC95%) | p     |
| Muerte total  | 0,71 (0,56-0,90)    | 0,005 | 0,67 (0,49-0,92)    | 0,013 | 0,77 (0,53-1,12)    | 0,172 |
| Muerte súbita | 0,52 (0,33-0,82)    | 0,005 | 0,59 (0,34-1,01)    | 0,054 | 0,40 (0,17-0,93)    | 0,034 |
| IC terminal   | 0,63 (0,43-0,93)    | 0,019 | 0,58 (0,34-0,99)    | 0,048 | 0,69 (0,40-1,19)    | 0,190 |
| Otras causas  | 1,22 (0,80-1,86)    | 0,350 | 1,01 (0,59-1,71)    | 0,980 | 1,71 (0,85-3,45)    | 0,130 |

HR: *hazard ratio*; IC: insuficiencia cardíaca; NYHA: clase funcional de la *New York Heart Association*; subHR: *sub-hazard ratio*.

«IC terminal» incluye IC refractaria y trasplante cardíaco. «Otras causas» incluye otras causas cardíacas y extracardíacas.

**Tabla 4 del material adicional**

Análisis de regresión de riesgos competitivos (modelo de Fine-Gray) para muerte súbita, en la población total (n=2.351)

|                                                | Univariado |             |        | Multivariado |             |       |
|------------------------------------------------|------------|-------------|--------|--------------|-------------|-------|
|                                                | subHR      | (IC95%)     | p      | subHR        | (IC95%)     | p     |
| <i>Desfibrilador automático</i>                | 0,73       | (0,46-1,14) | 0,169  | —            | —           | —     |
| <i>Bloqueadores beta</i>                       | 0,82       | (0,58-1,15) | 0,249  | —            | —           | —     |
| <i>IECA (o ARA-II)</i>                         | 0,62       | (0,43-0,89) | 0,009  | —            | —           | —     |
| <i>Antialdosterónicos</i>                      | 1,13       | (0,85-1,52) | 0,401  | —            | —           | —     |
| <i>N.º de tratamientos <math>\geq 2</math></i> | 0,60       | (0,43-0,86) | 0,005  | 0,68         | (0,47-0,97) | 0,035 |
| <i>Clase NYHA <math>\geq III</math></i>        | 1,23       | (0,92-1,63) | 0,161  | —            | —           | —     |
| <i>FEVI</i>                                    | 1,00       | (0,98-1,03) | 0,672  | —            | —           | —     |
| <i>TFGe</i>                                    | 0,99       | (0,98-0,99) | <0,001 | 0,99         | (0,98-0,99) | 0,011 |
| <i>NT-proBNP</i>                               | 1,63       | (1,15-2,32) | 0,006  | 1,61         | (1,12-2,33) | 0,011 |
| <i>(<math>\geq 1.000</math> pg/ml)</i>         | 1,92       | (1,33-2,78) | <0,001 | 1,68         | (1,15-2,44) | 0,007 |
| <i>No medido</i>                               | 1,04       | (0,67-1,62) | 0,850  | 1,01         | (0,65-1,58) | 0,960 |
| <i>Infarto previo</i>                          | 1,74       | (1,30-2,31) | 0,001  | 1,60         | (1,20-2,14) | 0,001 |

|                                        |      |                 |       |   |   |   |
|----------------------------------------|------|-----------------|-------|---|---|---|
| <i>Insuficiencia<br/>mitral III-IV</i> | 1,50 | (1,09-<br>2,07) | 0,013 | — | — | — |
|----------------------------------------|------|-----------------|-------|---|---|---|

ARA-II: antagonistas del receptor de la angiotensina II; FEVI: fracción de eyección del ventrículo izquierdo; IC: insuficiencia cardíaca; IC95%: intervalo de confianza del 95%; IECA: inhibidores de la enzima de conversión de la angiotensina; NYHA: clase funcional de la *New York Heart Association*; NT-proBNP: fracción N-terminal del péptido natriurético cerebral; subHR: *sub-hazard ratio*; TFGe: tasa de filtrado glomerular estimada.

Eventos competitivos: muertes no súbitas. Trasplante cardíaco codificado como muerte por IC refractaria.

### Tabla 5 del material adicional

Análisis de regresión de riesgos competitivos en la población global para los diferentes números de tratamientos combinados y muerte súbita

| Número de tratamientos combinados | subHR | (IC95%)     | p     |
|-----------------------------------|-------|-------------|-------|
| ≥ 1                               | 0,64  | (0,26-1,58) | 0,335 |
| ≥ 2                               | 0,60  | (0,43-0,86) | 0,005 |
| ≥ 3                               | 0,93  | (0,70-1,24) | 0,614 |
| ≥ 4                               | 0,85  | (0,52-1,39) | 0,510 |
| ≥ 5                               | 1,62  | (0,77-3,42) | 0,208 |

IC: insuficiencia cardiaca; IC95%: intervalo de confianza del 95%; subHR: *sub-hazard ratio*.

Eventos competitivos: muertes no súbitas. Trasplante cardiaco codificado como muerte por IC refractaria.
